# Supplementary material for: Dissecting the immune suppressive human prostate tumor microenvironment via integrated single-cell and spatial transcriptomic analyses
Source: Springer Nature journal article supplement (doi:10.1038/s41467-023-36325-2), 2023-02-07
Supplement: MOESM11 [file 41467_2023_36325_MOESM11_ESM.pdf]

## Reporting Summary

Nature Portfolio wishes to improve the reproducibility of the work that we publish. This form provides structure for consistency and transparency in reporting. For further information on Nature Portfolio policies, see our [Editorial Policies](#) and the [Editorial Policy Checklist](#).

### Statistics

For all statistical analyses, confirm that the following items are present in the figure legend, table legend, main text, or Methods section.

- | n/a                                 | Confirmed                                                                                                                                                                                                                                                                                      |
|-------------------------------------|------------------------------------------------------------------------------------------------------------------------------------------------------------------------------------------------------------------------------------------------------------------------------------------------|
| <input type="checkbox"/>            | <input checked="" type="checkbox"/> The exact sample size ( $n$ ) for each experimental group/condition, given as a discrete number and unit of measurement                                                                                                                                    |
| <input type="checkbox"/>            | <input checked="" type="checkbox"/> A statement on whether measurements were taken from distinct samples or whether the same sample was measured repeatedly                                                                                                                                    |
| <input type="checkbox"/>            | <input checked="" type="checkbox"/> The statistical test(s) used AND whether they are one- or two-sided<br><i>Only common tests should be described solely by name; describe more complex techniques in the Methods section.</i>                                                               |
| <input checked="" type="checkbox"/> | <input type="checkbox"/> A description of all covariates tested                                                                                                                                                                                                                                |
| <input type="checkbox"/>            | <input checked="" type="checkbox"/> A description of any assumptions or corrections, such as tests of normality and adjustment for multiple comparisons                                                                                                                                        |
| <input type="checkbox"/>            | <input checked="" type="checkbox"/> A full description of the statistical parameters including central tendency (e.g. means) or other basic estimates (e.g. regression coefficient) AND variation (e.g. standard deviation) or associated estimates of uncertainty (e.g. confidence intervals) |
| <input type="checkbox"/>            | <input checked="" type="checkbox"/> For null hypothesis testing, the test statistic (e.g. $F$ , $t$ , $r$ ) with confidence intervals, effect sizes, degrees of freedom and $P$ value noted<br><i>Give <math>P</math> values as exact values whenever suitable.</i>                            |
| <input checked="" type="checkbox"/> | <input type="checkbox"/> For Bayesian analysis, information on the choice of priors and Markov chain Monte Carlo settings                                                                                                                                                                      |
| <input checked="" type="checkbox"/> | <input type="checkbox"/> For hierarchical and complex designs, identification of the appropriate level for tests and full reporting of outcomes                                                                                                                                                |
| <input type="checkbox"/>            | <input checked="" type="checkbox"/> Estimates of effect sizes (e.g. Cohen's $d$ , Pearson's $r$ ), indicating how they were calculated                                                                                                                                                         |

Our web collection on [statistics for biologists](#) contains articles on many of the points above.

### Software and code

Policy information about [availability of computer code](#)

|                 |                                                                                                                                                                                                                                                                                                                                                                                                                                                                                                                                                                                                                                                                                                                                                                                                                                                                                                                                                                                                                                                                                                                                                                                                                           |
|-----------------|---------------------------------------------------------------------------------------------------------------------------------------------------------------------------------------------------------------------------------------------------------------------------------------------------------------------------------------------------------------------------------------------------------------------------------------------------------------------------------------------------------------------------------------------------------------------------------------------------------------------------------------------------------------------------------------------------------------------------------------------------------------------------------------------------------------------------------------------------------------------------------------------------------------------------------------------------------------------------------------------------------------------------------------------------------------------------------------------------------------------------------------------------------------------------------------------------------------------------|
| Data collection | NextSeq 500 Sequencing System (Illumina) and bcl2fastq 1.8.4 were used to acquire data.                                                                                                                                                                                                                                                                                                                                                                                                                                                                                                                                                                                                                                                                                                                                                                                                                                                                                                                                                                                                                                                                                                                                   |
| Data analysis   | The sequenced 10x libraries were mapped to GRCh38 human genome using Cell Ranger software (version 3.0.1), Conos were used to integrate multiple scRNA-seq datasets. inferCNV (version 1.3.3) was used to predict copy number variations (CNVs). We perform RNA velocity analysis using python package velocity (version 0.17) and scvelo (version 0.2.3). Slide-seq data was annotated using RCTD (version 2.0.0). Statistics significance tests and plots were generated with R (version 4.1.1). Code related to this manuscript can be found at <a href="https://github.com/shenglinmei/ProstateCancerAnalysis">https://github.com/shenglinmei/ProstateCancerAnalysis</a> . Spatial Differential gene expression analysis can be found at <a href="https://github.com/kharchenkolab/slideseqde">https://github.com/kharchenkolab/slideseqde</a> . For in vivo data, statistical analysis was done using Prism v9.5.0. Flow sorting for live-nonerythroid cells (DAPI-neg/CD235-neg) was performed on a BD FACS Aria III instrument (version 8.0.3) equipped with a 100um nozzle (BD Biosciences, San Jose, CA). All flow cytometry data were analyzed using FlowJo software (FlowJo 10.8.1, Treestar, San Carlos, CA). |

For manuscripts utilizing custom algorithms or software that are central to the research but not yet described in published literature, software must be made available to editors and reviewers. We strongly encourage code deposition in a community repository (e.g. GitHub). See the Nature Portfolio [guidelines for submitting code & software](#) for further information.

## Data

Policy information about [availability of data](#)

All manuscripts must include a [data availability statement](#). This statement should provide the following information, where applicable:

- Accession codes, unique identifiers, or web links for publicly available datasets
- A description of any restrictions on data availability
- For clinical datasets or third party data, please ensure that the statement adheres to our [policy](#)

Raw single-cell RNA sequencing data and processed data can be accessed from the NCBI Gene Expression Omnibus database : GSE181294 (token: stofmihuhzwjft). GRCh38 human reference genome was download from 10X genomics (<https://support.10xgenomics.com/single-cell-gene-expression/software/downloads/>). For the joint alignment analysis with public scRNAseq data. We downloaded raw count matrix for PDAC (<https://ngdc.cncb.ac.cn/bioproject/browse/PRJCA001063>), LIHC(<https://www.ncbi.nlm.nih.gov/geo/query/acc.cgi?acc=GSE140228>), LUSC(<https://www.ebi.ac.uk/biostudies/arrayexpress/studies/E-MTAB-6149>), HNSC(<https://www.ncbi.nlm.nih.gov/geo/query/acc.cgi?acc=GSE139324>). Prostate cancer bulk RNAseq and microarray data are download from the NCBI Gene Expression Omnibus database: GSE21034 (<https://www.ncbi.nlm.nih.gov/geo/query/acc.cgi?acc=GSE21034>), GSE97284 (<https://www.ncbi.nlm.nih.gov/geo/query/acc.cgi?acc=GSE97284>), TCGA ([https://www.cbiportal.org/study/clinicalData?id=prad\\_tcga](https://www.cbiportal.org/study/clinicalData?id=prad_tcga)), GSE70770 (<https://www.ncbi.nlm.nih.gov/geo/query/acc.cgi?acc=GSE70770>).

## Human research participants

Policy information about [studies involving human research participants and Sex and Gender in Research](#).

|                             |                                                                                                                                                                                                                                                                                                                                                                                                   |
|-----------------------------|---------------------------------------------------------------------------------------------------------------------------------------------------------------------------------------------------------------------------------------------------------------------------------------------------------------------------------------------------------------------------------------------------|
| Reporting on sex and gender | All samples in our study were collected from males.                                                                                                                                                                                                                                                                                                                                               |
| Population characteristics  | All prostate cancer patients were males at the ages of 46-73. Healthy prostate tissues were collected from cystoprostatectomy surgeries (4 samples) and one from autopsy. All patients' clinical characterization are included in Supplementary Data 1.                                                                                                                                           |
| Recruitment                 | Patients clinically indicated for prostatectomy surgeries (prostate removal) or cystoprostatectomy surgeries due to bladder cancer (bladder+prostate removal) were asked if specimens could be collected and used for the intended study. The autopsy was collected from MGH rapid autopsy program. All the human specimens and organisms involved in this study were allocated in randomization. |
| Ethics oversight            | In accordance with the U.S. Common Rule and after Institutional Review Board (IRB) approval, all human tissues were collected at Massachusetts General Hospital (MGH, Boston, MA) and carried out with institutional review board (IRB) approval (IRB#2003P000641). Written informed consents were obtained from all participants in the study.                                                   |

Note that full information on the approval of the study protocol must also be provided in the manuscript.

## Field-specific reporting

Please select the one below that is the best fit for your research. If you are not sure, read the appropriate sections before making your selection.

☒ Life sciences ☐ Behavioural & social sciences ☐ Ecological, evolutionary & environmental sciences

For a reference copy of the document with all sections, see [nature.com/documents/nr-reporting-summary-flat.pdf](https://www.nature.com/documents/nr-reporting-summary-flat.pdf)

## Life sciences study design

All studies must disclose on these points even when the disclosure is negative.

|                 |                                                                                                                                                                                                                                                                                                                                                                                                                                                                                                                                                                                            |
|-----------------|--------------------------------------------------------------------------------------------------------------------------------------------------------------------------------------------------------------------------------------------------------------------------------------------------------------------------------------------------------------------------------------------------------------------------------------------------------------------------------------------------------------------------------------------------------------------------------------------|
| Sample size     | 39 single cell RNA-seq samples and 12 Slide-seqV2 samples were included in this study. Sample sizes were chosen in a manner commensurate with similar previous studies (Bi et al., 2021, and Chen et al., 2021).                                                                                                                                                                                                                                                                                                                                                                           |
| Data exclusions | We applied two general quality measures on raw gene-cell-barcode matrix for each cell: Total UMI > 600 and Scrublet scores < 0.4. PCA24 (PCA24-N-LG_Collagenases+Dispace, PCA24-N-LG_Rocky) was excluded in this study which was only used for the comparison between two different dissociation protocols: Collagenases+Dispace and Rocky.                                                                                                                                                                                                                                                |
| Replication     | Biological replicates from multiple patients were included in our data. Replication within single cell RNA sequencing is defined as recurrent results in all patients. In this study we have 19 patients, hence 19 replicates of our results.                                                                                                                                                                                                                                                                                                                                              |
| Randomization   | The patients were recruited randomly in this study. 19 treatment-naïve patients were diagnosed with prostate adenocarcinoma and underwent radical prostatectomy. We separate patients into different groups based on tumor grades score (low-grade: Gleason 6 and 7; high-grade: Gleason 8-10). Benign prostate gland tissue adjacent to the tumor was collected as adj-normal. In vivo experiments were done on C57Bl6 mice ordered from Jackson Laboratory and were of the same age and gender (males). For treatment, mice were randomized when tumor volume reached average of 300mm3. |

Blinding

Investigators were blinded at data collection and experimental group was checked after conducting the experiment.

## Reporting for specific materials, systems and methods

We require information from authors about some types of materials, experimental systems and methods used in many studies. Here, indicate whether each material, system or method listed is relevant to your study. If you are not sure if a list item applies to your research, read the appropriate section before selecting a response.

### Materials & experimental systems

| n/a                                 | Involved in the study                                           |
|-------------------------------------|-----------------------------------------------------------------|
| <input type="checkbox"/>            | <input checked="" type="checkbox"/> Antibodies                  |
| <input type="checkbox"/>            | <input checked="" type="checkbox"/> Eukaryotic cell lines       |
| <input checked="" type="checkbox"/> | <input type="checkbox"/> Palaeontology and archaeology          |
| <input type="checkbox"/>            | <input checked="" type="checkbox"/> Animals and other organisms |
| <input checked="" type="checkbox"/> | <input type="checkbox"/> Clinical data                          |
| <input checked="" type="checkbox"/> | <input type="checkbox"/> Dual use research of concern           |

### Methods

| n/a                                 | Involved in the study                              |
|-------------------------------------|----------------------------------------------------|
| <input checked="" type="checkbox"/> | <input type="checkbox"/> ChIP-seq                  |
| <input type="checkbox"/>            | <input checked="" type="checkbox"/> Flow cytometry |
| <input checked="" type="checkbox"/> | <input type="checkbox"/> MRI-based neuroimaging    |

## Antibodies

Antibodies used

Human sort for scRNAseq: anti-human CD235-PE (Biolegend, Catalogue# 306604, Clone: HIR2, lot# B260964)

For multiplex Immunohistochemistry: CD3 (Rabbit polyclonal, Dako), CD8 (C8/144B, Mouse monoclonal, Dako), PD-1 (Cell signaling, Catalogue# 43248S, Clone: EH33, Mouse monoclonal), FOXP3 (Cell signaling, Catalogue# 74816, Clone: D2W8E, Rabbit monoclonal), CD68 (PG-M1, Mouse monoclonal, Dako), CD163 (Leica Biosystem, Catalogue# CD163-L-CE, Clone: 10D6, Mouse monoclonal). Secondary antibody conjugated to horse radish peroxidase (HRP), and an opal fluorophore (Opal 690, Opal 570, Opal 540, Opal 620, Opal 650 and Opal 520, Akoya Biosciences).

The antibodies used for flow sorting has been added as a supplementary Data 7. For CCL20 blocking antibody (R&D, cat#MAB7601, and Rat IgG isotype control from R&D of cat#MAB005, anti-PD1 from BioXcell of cat#BE0146 and its IgG2a isotype control from BioXcell of cat#BE0089).

Validation

Validation of primary antibodies as determined by manufacturer. The antibodies has been verified to be used on human samples and quality tested to be used on Flow Cytometry.

## Eukaryotic cell lines

Policy information about [cell lines and Sex and Gender in Research](#)

Cell line source(s)

RM1 cells (male), ATCC#CRL-3310

Authentication

We didnot do authentication for RM1 cells.

Mycoplasma contamination

The cells were regularly checked for mycoplasma and tested negative.

Commonly misidentified lines  
(See [ICLAC](#) register)

No commonly misidentified line was involved in this study.

## Animals and other research organisms

Policy information about [studies involving animals; ARRIVE guidelines](#) recommended for reporting animal research, and [Sex and Gender in Research](#)

Laboratory animals

All animals were C57Bl6 mice obtained from Jackson Laboratories of age 6-8 weeks old at the time of experiment start. The housing conditions for the mice are as the following:  
Lighting - rodent rooms is 12:12, light:dark (7 am – 7 pm)  
Bedding type - Hardwood Sanichip; with Carefresh nesting material  
Rodent housing - either Allentown Inc (rectangular caging, 160 cages per IVC rack; which uses blower at 60 ACH ) or Animal Care Systems (pie-shaped caging, 100 cages per round rack using house exhaust)  
Room Temp = 68 – 73°F  
Relative Humidity = 30-70%

Wild animals

No wild animals were used in the study.

Reporting on sex

All animals used in our study were males.

Field-collected samples

No field collected samples were used in the study.

Ethics oversight

All animal studies were done in accordance Institutional Animal Care and Use Committee of Massachusetts General Hospital guidelines.

Note that full information on the approval of the study protocol must also be provided in the manuscript.

## Flow Cytometry

### Plots

Confirm that:

- ☒ The axis labels state the marker and fluorochrome used (e.g. CD4-FITC).
- ☒ The axis scales are clearly visible. Include numbers along axes only for bottom left plot of group (a 'group' is an analysis of identical markers).
- ☒ All plots are contour plots with outliers or pseudocolor plots.
- ☒ A numerical value for number of cells or percentage (with statistics) is provided.

### Methodology

Sample preparation

Dissociation of tissues into single cells: All samples were collected in Media 199 supplemented with 2% (v/v) FBS. Single cell suspensions of the tumors were obtained by cutting the tumor in to small pieces (1mm<sup>3</sup>) followed by enzymatic dissociation for 45 minutes at 37°C with shaking at 120 rpm using Collagenase I, Collagenase II, Collagenase III, Collagenase IV (all at a concentration of 1mg/ml) and Dispase (2mg/ml) in the presence of RNase inhibitors (RNasin (Promega), RNase OUT (Invitrogen)), and DNase I (ThermoFisher). Erythrocytes were subsequently removed by ACK Lysing buffer (Quality Biological) and cells resuspended in Media 199 supplemented with 2% (v/v) FBS for further analysis.

FACS sorting: Single cells from tumor samples were surface stained with anti-CD235-PE (Biolegend) for 30 min at 4°C. Cells were washed twice with 2% FBS-PBS (v/v) followed by DAPI staining (1 ug/ml). Flow sorting for live-nonerythroid cells (DAPI-neg/CD235-neg) was performed on a BD FACS Aria III instrument equipped with a 100um nozzle (BD Biosciences, San Jose, CA). All flow cytometry data were analyzed using FlowJo software (FlowJo 10.8.1, Treestar, San Carlos, CA).

Instrument

BD FACS Aria III instrument (BD Biosciences, San Jose, CA).

Software

FlowJo software (FlowJo 10.8.1, Treestar, San Carlos, CA).

Cell population abundance

For all samples that were cell sorted for single-cell profiling by 10X, live cells that were CD235 negative (e.g. erythroid cells) were 80-90% of total cells.

Gating strategy

Cells were selected first based on FSC-A and SCC-A followed by singlet selection for both FSC and SSC. Then live cells were selected based on DAPI staining (DAPI negative) followed by selection of CD235 negative cells which were sorted for 10x experiments (DAPIneg CD235neg).

- ☒ Tick this box to confirm that a figure exemplifying the gating strategy is provided in the Supplementary Information.
